# Supplementary material for: Construction of muscle-like metallo-supramolecular polymers from a pillar[5]arene-based [c2]daisy chain
Source: Royal Society of Chemistry journal article supplement (doi:10.1039/c4py00733f), 2014-01-01
Supplement: c4py00733f1.pdf [file c4py00733f1.pdf]

# Construction of muscle-like metallo-supramolecular polymers from a pillar[5]arene-based [c2]daisy chain

Lingyan Gao, Zibin Zhang, Bo Zheng, and Feihe Huang\*

*State Key Laboratory of Chemical Engineering, Department of Chemistry, Zhejiang University, Hangzhou 310027, P. R. China. Fax and Tel: +86-571-8795-3189; Email address: fhuang@zju.edu.cn.*

## Electronic Supplementary Information

|    |                                                                        |    |
|----|------------------------------------------------------------------------|----|
| 1. | <i>Materials and methods</i>                                           | S2 |
| 2. | <i>Characterizations of compound 1</i>                                 | S2 |
| 3. | <i>Self-assembly morphologies of polymer Fe1 in different solvents</i> | S4 |
|    | <i>References</i>                                                      | S4 |

## 1. Materials and methods

All reagents were commercially available and used as supplied without further purification. Compounds **2**<sup>S1</sup>, **3**<sup>S1</sup> and **4**<sup>S2</sup> were prepared according to published procedures.<sup>S1</sup> NMR spectra were recorded with an Agilent 600 MHz DD2 spectrophotometer, a Bruker Avance DMX 500 spectrophotometer, or a Bruker Avance DMX 400 spectrophotometer using the deuterated solvent as the lock and the residual solvent or TMS as the internal reference. MALDI-TOF mass spectrometry was performed on a Shimadzu Biotech AXIMA Performance instrument. UV-vis spectra were obtained on a UV-2550PC instrument. Titration experiments and Job plot were performed in quartz cuvettes scanning in the range of 250–700 nm. Transmission electron microscopy investigations were carried out on a JEM-1200EX instrument. Scanning electron microscopy investigations were carried out on a JEOL 6390LV instrument. Dynamic light scattering was carried out on a Malvern Nanosizer S instrument at room temperature.

## 2. Characterization of compound **1**

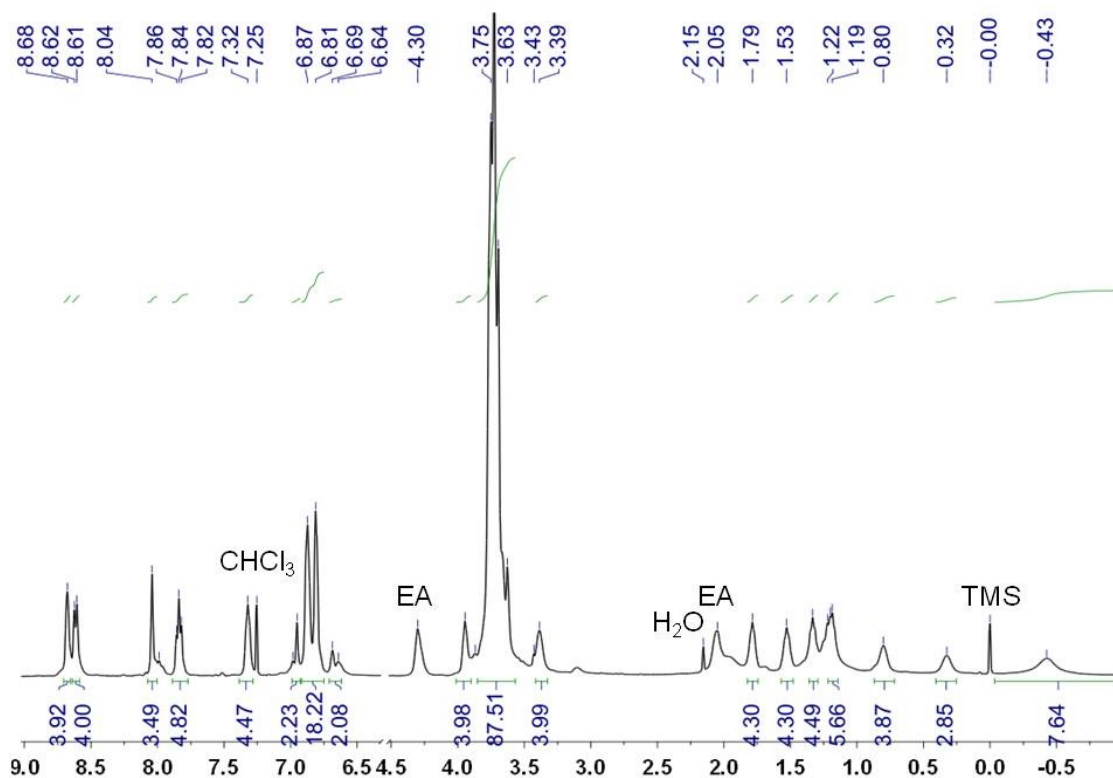

**Fig. S1** <sup>1</sup>H NMR spectrum (400 MHz, CDCl<sub>3</sub>, 298 K) of **1**.

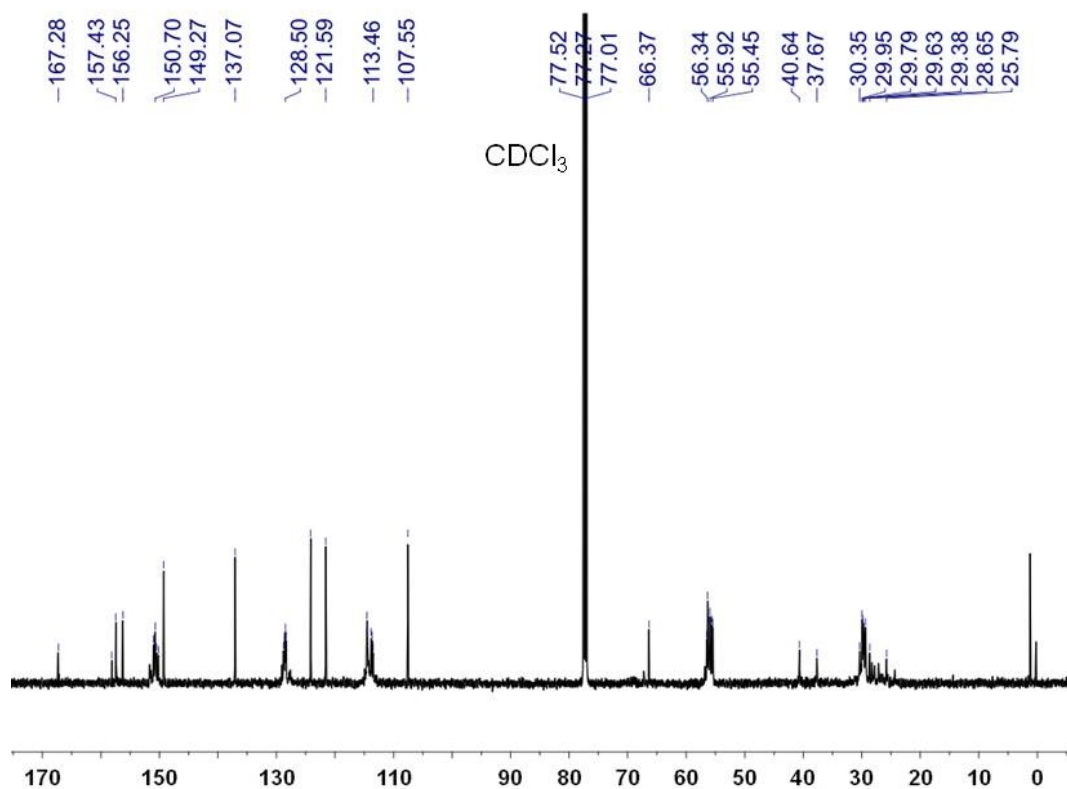

**Fig. S2** <sup>13</sup>C NMR spectrum (125 MHz, CDCl<sub>3</sub>, 298 K) of **1**.

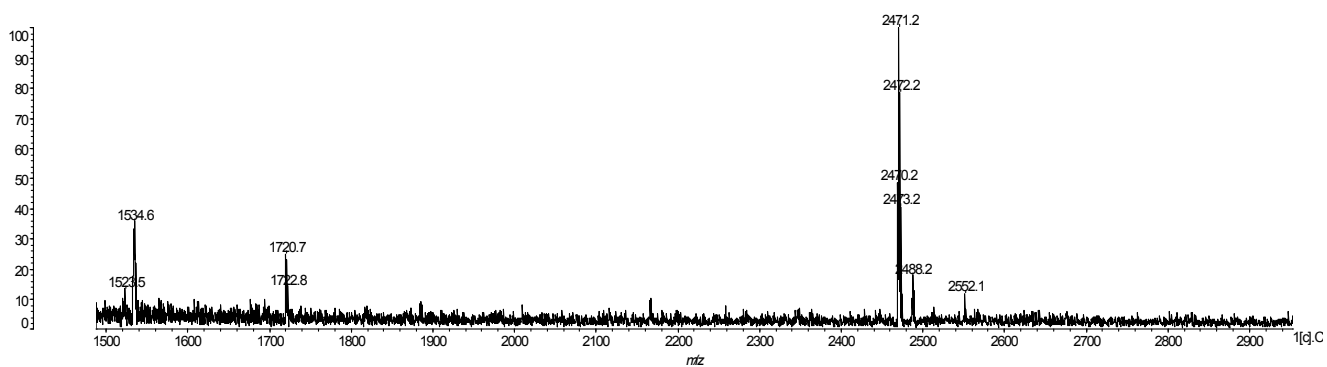

**Fig. S3** MALDI-TOF mass spectrum of **1**. Assignment of the main peak:  $m/z$  2471.2 [M + Na]<sup>+</sup> (100%).

### 3. Self-assembly morphologies of polymer **Fe1** in different solvents

The self-assembly morphologies of metallo-supramolecular polymer **Fe1** in different solvents [chloroform (Figure S4a and d), a mixture of chloroform and DMSO (v/v, 1:1) (Figure 3 and Figure S4b and e) and DMSO (Figure S4c and f)] with the same concentration of 1.00 mM were revealed by TEM and SEM. Both TEM (Figures 3 and S4a–c) and SEM (Figures 3 and S4d–f) results revealed that polymer **Fe1** formed filamentous structures with three different solvent compositions.

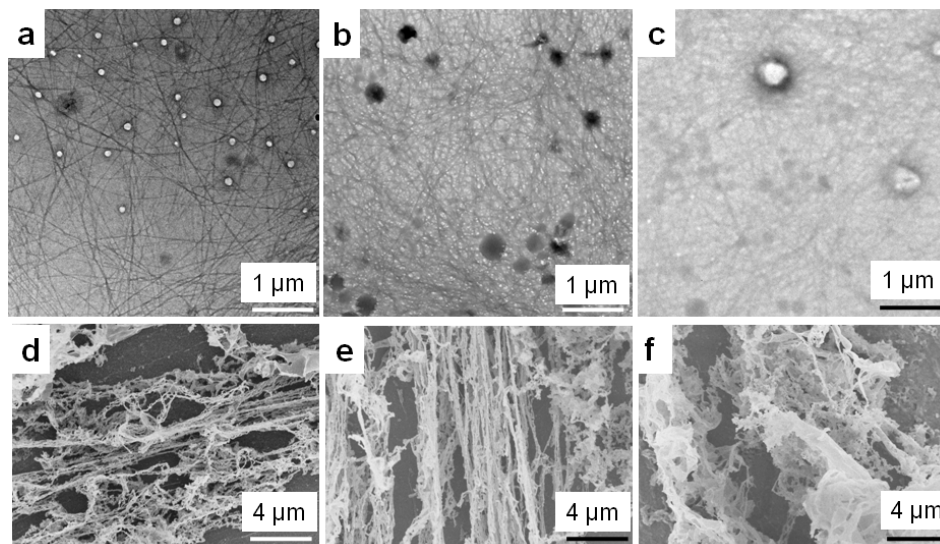

**Fig. S4** (a, b and c) TEM and (d, e and f) SEM images of fibrous networks prepared from 1.00 mM **Fe1** in different solvents [chloroform (a and d), a mixture of chloroform and DMSO (v/v, 1:1) (b and e), and DMSO (c and f)].

### References

1. Z. Zhang, C. Han, G. Yu and F. Huang, *Chem. Sci.*, 2012, **3**, 3026.
2. E. J. Cho, S. Jung, K. Lee, H. J. Lee, K. C. Nam and H.-J. Bae, *Chem. Commun.* 2010, **46**, 6557.
3. G. Du, E. Moulin, N. Jouault, E. Buhler and N. Giuseppone, *Angew. Chem. Int. Ed.*, 2012, **51**, 12504.
